# Supplementary material for: Polymorphic forms of antiandrogenic drug nilutamide: structural and thermodynamic aspects
Source: Royal Society of Chemistry journal article supplement (doi:10.1039/d1cp00793a), 2021-01-01
Supplement: d1cp00793a1.pdf [file d1cp00793a1.pdf]

## **Polymorphic forms of antiandrogenic drug nilutamide: structural and thermodynamic aspects**

*Artem O. Surov,<sup>a\*</sup> Alexander P. Voronin,<sup>a</sup> Ksenia V. Drozd,<sup>a</sup> Matvey S. Gruzdev,<sup>a</sup> German L. Perlovich<sup>a\*</sup>*

*Jupally Prashanth<sup>b</sup>, Sridhar Balasubramanian<sup>b,c\*</sup>*

<sup>a</sup>G.A. Krestov Institute of Solution Chemistry of the Russian Academy of Sciences, 1 Akademicheskaya St., 153045 Ivanovo, Russia

<sup>b</sup>Centre for X-ray Crystallography, Department of Analytical & Structural Chemistry, CSIR-Indian Institute of Chemical Technology, Tarnaka, Uppal Road, Hyderabad-500007, Telangana, India.

<sup>c</sup>Academy of Scientific and Innovative Research (AcSIR), Uttar Pradesh- 201 002, India

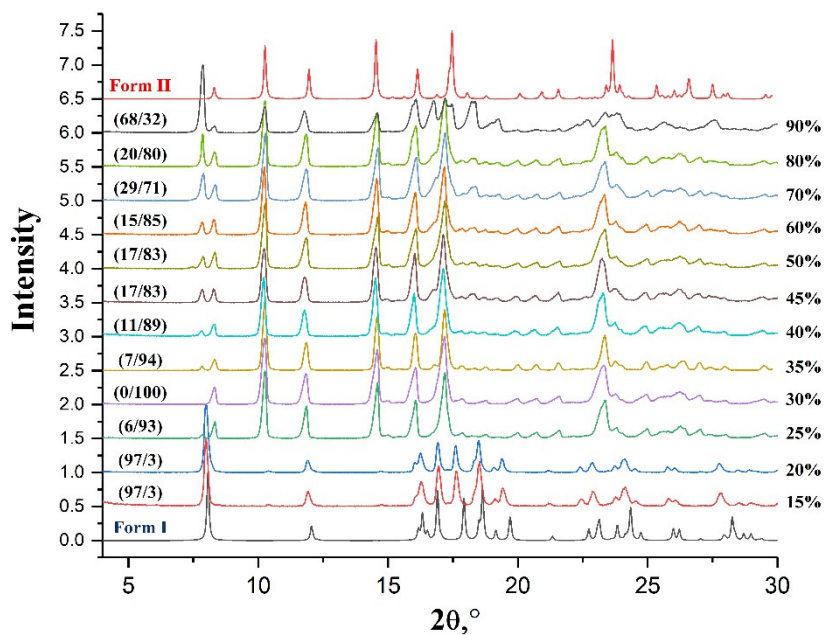

**Figure S1.** Results of PXRD analysis of the freeze-dried powders of nilutamide obtained from 1,4-dioxane/water solvents with different components ratio. The numbers show percentage of 1,4-dioxane in a 1,4-dioxane/water mixture. The numbers in parentheses correspond the relative amount of polymorphic forms (Form I/Form II) in the resulting products derived from quantitative analysis in the Bruker TOPAS6 software [1].

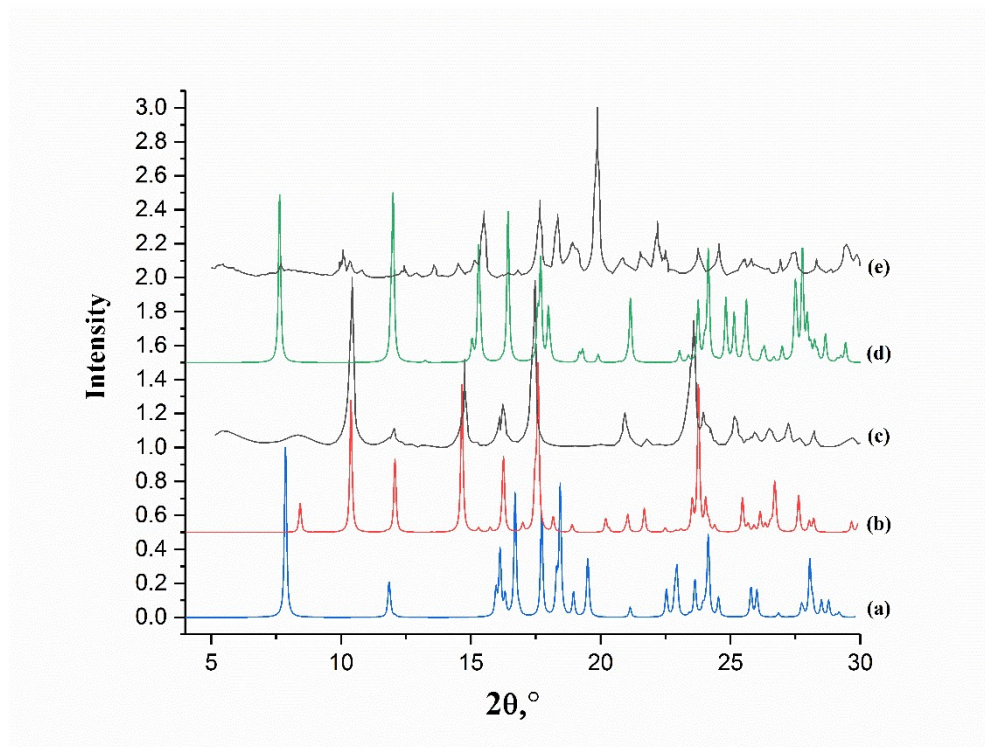

**Figure S2.** Calculated PXRD patterns of Form I (a) and Form II (b); experimental PXRD patterns of “metastable form I” (c) reproduced from Fig. 8 of the Trasi & Taylor paper [2]; calculated PXRD patterns of Form III (d); experimental PXRD patterns of “metastable form II” (e) reproduced from Fig. 8 of the Trasi & Taylor paper [2].

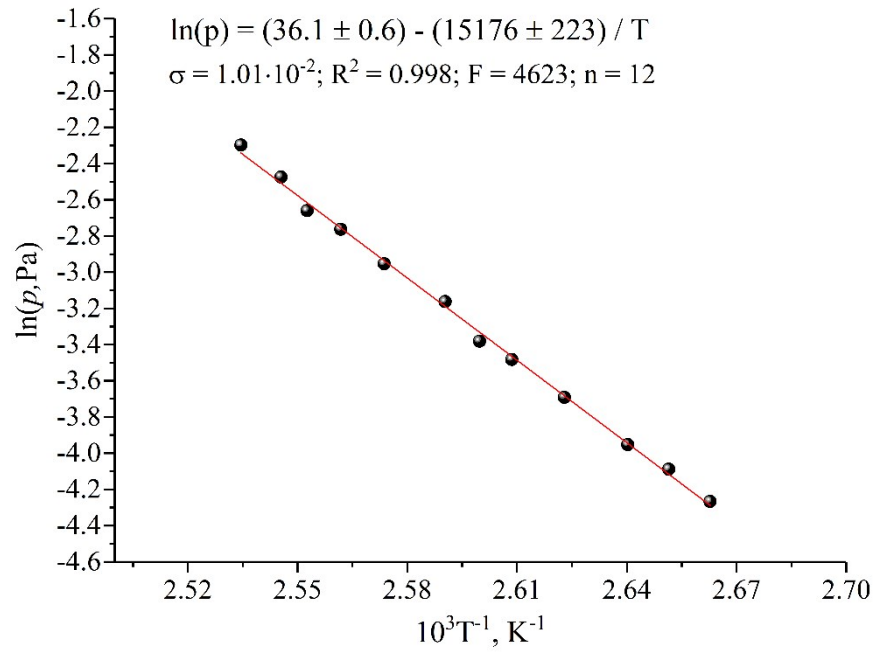

**Figure S3.** Plot of vapor pressure  $\ln(p, Pa)$  against reciprocal temperature for nilutamide Form I

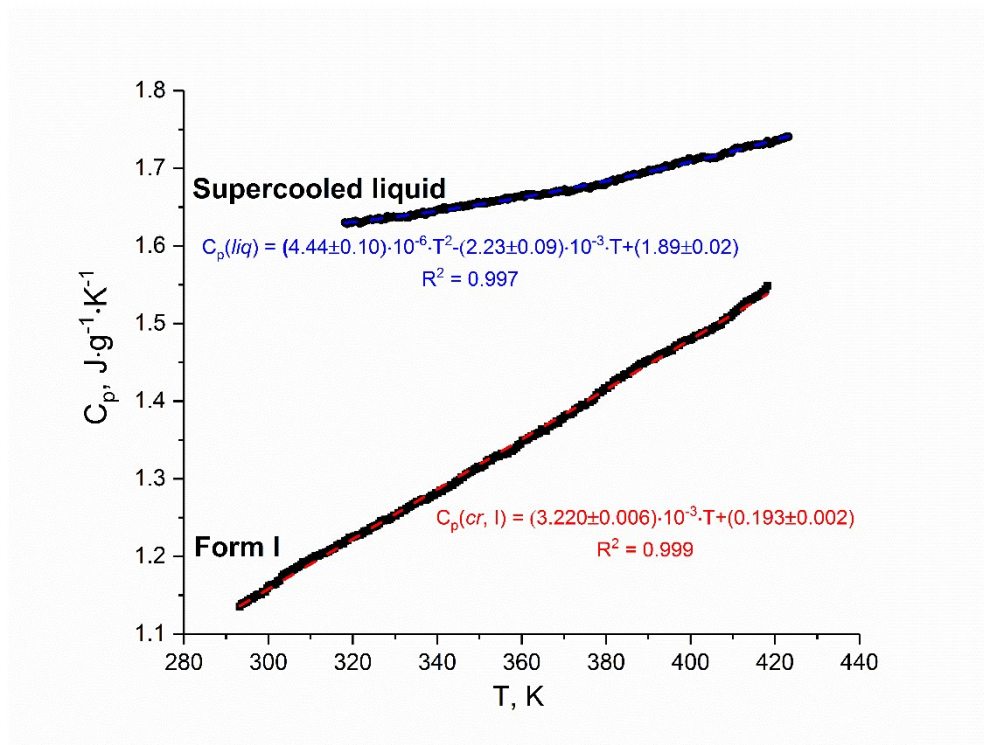

**Figure S4.** Experimental temperature dependences of  $C_p$  of Form I and the supercooled liquid of nilutamide

**Table S1.** Crystallographic data for Form II and Form III of nilutamide [3-5]

| Compounds                                                                  | Form II                                                                      | Form III                                                                     |
|----------------------------------------------------------------------------|------------------------------------------------------------------------------|------------------------------------------------------------------------------|
| CCDC numbers                                                               | 2063187                                                                      | 2063188                                                                      |
| Crystal data                                                               |                                                                              |                                                                              |
| Chemical formula                                                           | C <sub>12</sub> H <sub>10</sub> F <sub>3</sub> N <sub>3</sub> O <sub>4</sub> | C <sub>12</sub> H <sub>10</sub> F <sub>3</sub> N <sub>3</sub> O <sub>4</sub> |
| $M_r$                                                                      | 317.23                                                                       | 317.23                                                                       |
| Crystal system, space group                                                | Triclinic, <i>P</i> 1                                                        | Monoclinic, <i>C</i> 2/ <i>c</i>                                             |
| Temperature (K)                                                            | 100                                                                          | 100                                                                          |
| $a, b, c$ (Å)                                                              | 7.5763 (8), 8.5961 (9), 10.7211 (10)                                         | 11.1754 (5), 10.0868 (4), 23.6466 (10)                                       |
| $\alpha, \beta, \gamma$ (°)                                                | 100.721 (3), 99.964 (3), 91.329 (4)                                          | 90, 101.8274 (19), 90                                                        |
| $V$ (Å <sup>3</sup> )                                                      | 674.59 (12)                                                                  | 2608.95 (19)                                                                 |
| $Z$                                                                        | 2                                                                            | 8                                                                            |
| Radiation type                                                             | Mo $K\alpha$                                                                 | Mo $K\alpha$                                                                 |
| $\mu$ (mm <sup>-1</sup> )                                                  | 0.14                                                                         | 0.15                                                                         |
| Crystal size (mm)                                                          | 0.24 × 0.20 × 0.08                                                           | 0.36 × 0.30 × 0.15                                                           |
| Data collection                                                            |                                                                              |                                                                              |
| Diffractometer                                                             | Bruker D8 QUEST PHOTON-100                                                   | Bruker D8 QUEST PHOTON-100                                                   |
| Absorption correction                                                      | Multi-scan<br><i>SADABS</i> , Bruker, 2016                                   | Multi-scan<br><i>SADABS</i> , Bruker, 2016                                   |
| $T_{\min}, T_{\max}$                                                       | 0.513, 0.746                                                                 | 0.659, 0.746                                                                 |
| No. of measured, independent and observed [ $I > 2\sigma(I)$ ] reflections | 16594, 4137, 3505                                                            | 17180, 3995, 3421                                                            |
| $R_{\text{int}}$                                                           | 0.056                                                                        | 0.023                                                                        |
| $(\sin \theta/\lambda)_{\text{max}}$ (Å <sup>-1</sup> )                    | 0.716                                                                        | 0.716                                                                        |
| Refinement                                                                 |                                                                              |                                                                              |
| $R[F^2 > 2\sigma(F^2)], wR(F^2), S$                                        | 0.043, 0.116, 1.07                                                           | 0.037, 0.098, 1.06                                                           |
| No. of reflections                                                         | 4137                                                                         | 3995                                                                         |
| No. of parameters                                                          | 205                                                                          | 205                                                                          |
| H-atom treatment                                                           | H atoms treated by a mixture of independent and constrained refinement       | H atoms treated by a mixture of independent and constrained refinement       |
| $\Delta\rho_{\text{max}}, \Delta\rho_{\text{min}}$ (e Å <sup>-3</sup> )    | 0.41, -0.46                                                                  | 0.43, -0.31                                                                  |

**Table S2.** Hydrogen-bond geometry (Å, °) for Forms II and III.

| $D-H\cdots A$                       | $D-H$      | $H\cdots A$ | $D\cdots A$ | $D-H\cdots A$ |
|-------------------------------------|------------|-------------|-------------|---------------|
| Form II                             |            |             |             |               |
| N3—H3N $\cdots$ O3 <sup>i</sup>     | 0.894 (17) | 2.008 (17)  | 2.8923 (12) | 170.1 (16)    |
| C12—H12B $\cdots$ O4 <sup>ii</sup>  | 0.98       | 2.55        | 3.4072 (15) | 145           |
| Form III                            |            |             |             |               |
| N3—H3N $\cdots$ O3 <sup>i</sup>     | 0.880 (16) | 2.083 (17)  | 2.9183 (11) | 158.1 (15)    |
| C11—H11A $\cdots$ O2 <sup>ii</sup>  | 0.98       | 2.60        | 3.5666 (14) | 170           |
| C11—H11B $\cdots$ O3 <sup>iii</sup> | 0.98       | 2.52        | 3.4337 (14) | 156           |

Form II - Symmetry codes: (i)  $-x, -y+1, -z+2$ ; (ii)  $-x+1, -y+2, -z+2$ .

Form III - Symmetry codes: (i)  $-x+1, y, -z+1/2$ ; (ii)  $x-1/2, -y+1/2, z-1/2$ ; (iii)  $x-1/2, y-1/2, z$ .

**Table S3.** The weight, g (mg), solution concentrations,  $m$  (mol kg<sup>-1</sup>), and solution enthalpies,  $\Delta_{sol}H_m^0$  (kJ·mol<sup>-1</sup>), of nilutamide polymorphs in ethanol at 25.0 °C.

| <b>Form I</b>           |                   |                     | <b>Form II</b>           |                   |                     |
|-------------------------|-------------------|---------------------|--------------------------|-------------------|---------------------|
| g                       | $m \cdot 10^{-3}$ | $\Delta_{sol}H_m^0$ | g                        | $m \cdot 10^{-3}$ | $\Delta_{sol}H_m^0$ |
| 29.72                   | 4.08              | 30.6                | 41.67                    | 5.74              | 29.2                |
| 30.06                   | 4.10              | 30.5                | 22.23                    | 3.10              | 29.5                |
| 21.52                   | 3.01              | 30.4                | 15.20                    | 2.10              | 29.4                |
| 25.63                   | 3.55              | 30.8                | 10.76                    | 1.48              | 29.4                |
| 22.59                   | 3.13              | 30.3                | 15.08                    | 1.98              | 29.4                |
| $\Delta_{sol}H_m^0$ (I) |                   | =30.5±0.2           | $\Delta_{sol}H_m^0$ (II) |                   | =29.4±0.1           |



**Table S4.** Root-mean-square deviation of atomic positions ( $\text{RMSD}_{15}$ ), excluding H atoms, between the experimental and the optimized structures calculated using the Crystal Packing Similarity module implemented in Mercury for the cluster consisting of 15 molecules

| Method                  | Form I | Form II                     |
|-------------------------|--------|-----------------------------|
| GTO-DFT                 |        |                             |
| B3LYP-D3/6-31(F+)G(d,p) | 0.044  | 0.117                       |
| B3LYP-D3/pob-TZVP-rev2  | 0.041  | 0.105                       |
| PBE-D3/6-31(F+)G(d,p)   | 0.075  | 0.114                       |
| M06-2X-D3/pob-TZVP-rev2 | 0.117  | <i>0.319</i> (12 out of 15) |
| PBEh-3c/def2-mSVP       | 0.090  | 0.082                       |
| PBE0-D3/6-31(F+)G(d,p)  | 0.051  | 0.087                       |
| PW-DFT                  |        |                             |
| PBE-D3                  | 0.027  | 0.043                       |
| B86BPBE-XDM             | 0.031  | 0.045                       |

## References

1. Coelho, A., TOPAS and TOPAS-Academic: an optimization program integrating computer algebra and crystallographic objects written in C++. *Journal of Applied Crystallography*, 2018. 51(1): p. 210-218.
2. Trasi, N.S. and L.S. Taylor, Nucleation and crystal growth of amorphous nilutamide – unusual low temperature behavior. *CrystEngComm*, 2014. 16(31): p. 7186-7195.
3. Bruker, SAINT-Plus, SMART and SADABS. Bruker AXS Inc., Madison, Wisconsin, USA 2016.
4. Sheldrick, G.M, SHELXT - Integrated space-group and crystal-structure determination. *Acta Crystallographica Section A*, 2015. 71: p. 3-8.
5. Diamond - Crystal and Molecular Structure Visualization. Crystal Impact - Dr. H. Putz & Dr. K. Brandenburg GbR, Kreuzherrenstr. 102, 53227 Bonn, Germany  
<http://www.crystalimpact.com/diamond>
